# Supplementary material for: Persistent activity of aerobic methane-oxidizing bacteria in anoxic lake waters due to metabolic versatility
Source: PubMed Central journal article supplement (PMC11192741; doi:10.1038/s41467-024-49602-5), 2024-06-21
Supplement: 41467_2024_49602_MOESM3_ESM.pdf [file 41467_2024_49602_MOESM3_ESM.pdf]

## **Description of Additional Supplementary Files:**

**Supplementary Dataset 1:** Methylococcales 16S rRNA gene phylogenetic tree, containing partial, metagenome assembled 16S rRNA gene sequences.

**Supplementary Dataset 2:** Statistics on methane oxidation and denitrification rates.

**Supplementary Dataset 3:** Metagenome-assembled 16S rRNA gene sequences from Lake Zug (in fasta format).

**Supplementary Dataset 4:** Raw phyloflash results.

**Supplementary Dataset 5:** List of genes related to methane oxidation, denitrification and fermentation analyzed in metatranscriptomic and metagenomic datasets.
