# Supplementary material for: Persistent activity of aerobic methane-oxidizing bacteria in anoxic lake waters due to metabolic versatility
Source: PubMed Central journal article supplement (PMC11192741; doi:10.1038/s41467-024-49602-5), 2024-06-21
Supplement: 41467_2024_49602_MOESM4_ESM.pdf [file 41467_2024_49602_MOESM4_ESM.pdf]

Supplementary Dataset 1  
16S rRNA gene phylogeny

- Genome-derived 16S rRNA gene sequences
- 16S rRNA gene sequences from metagenomes (this study)

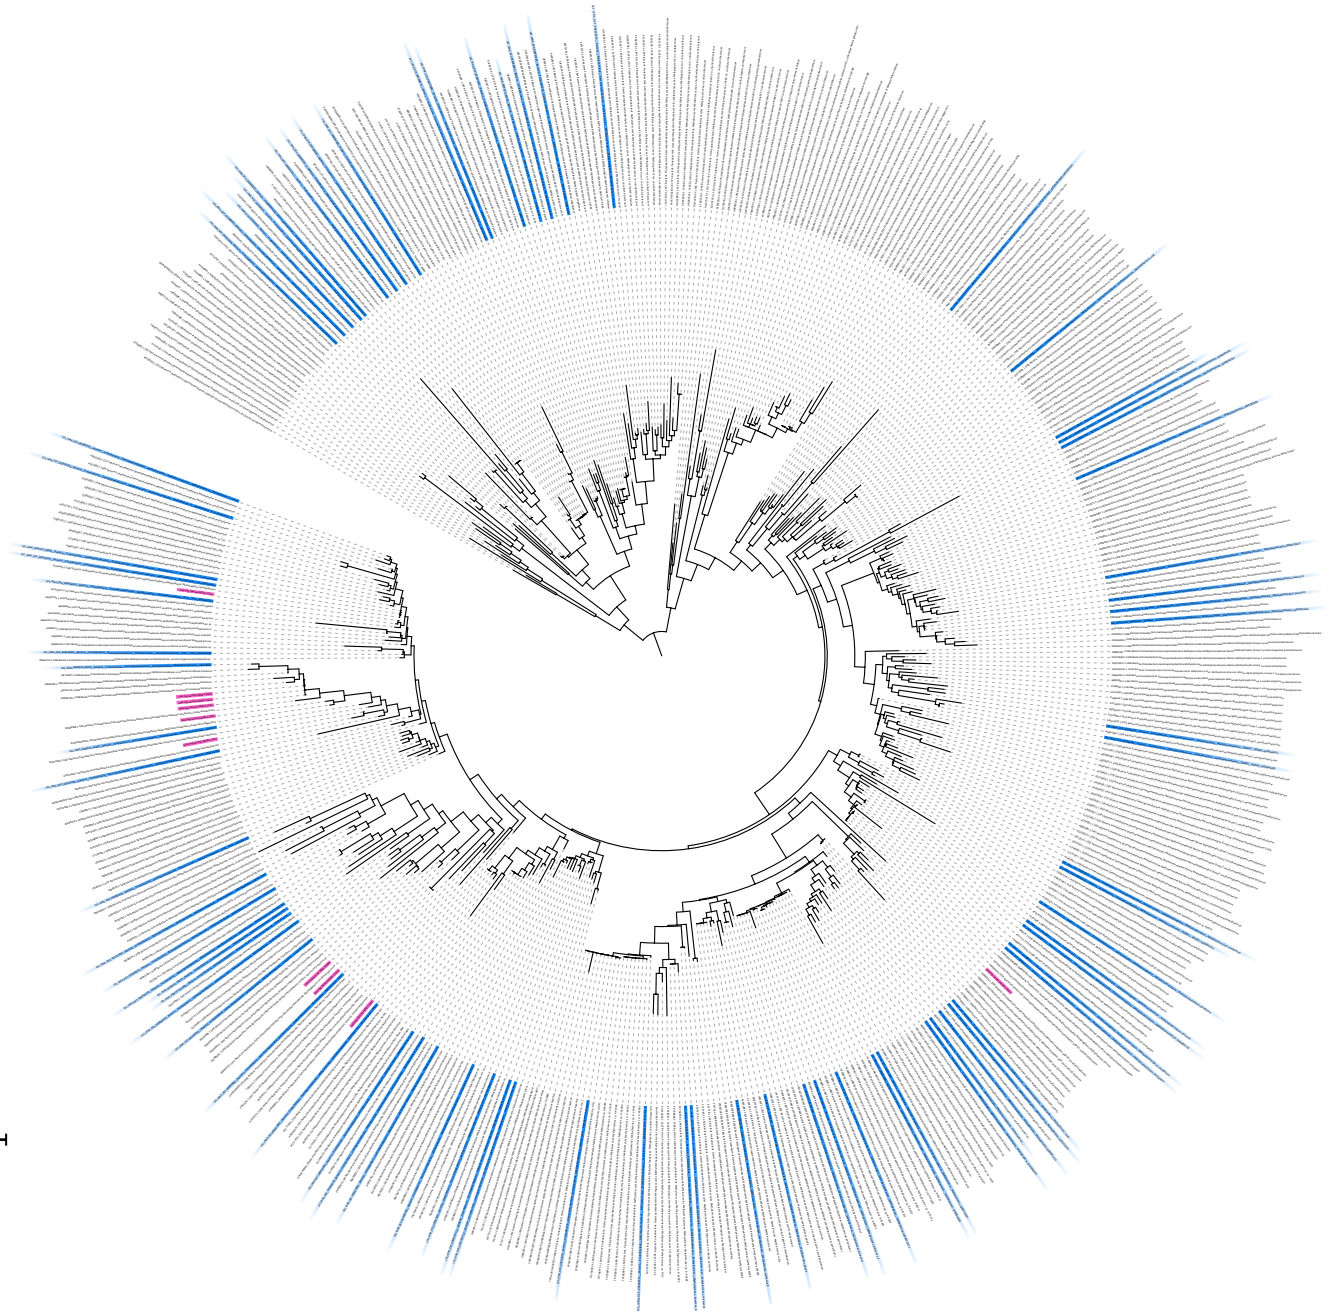

Tree scale: 0.1
